# Supplementary material for: Blue LED mediated synthesis of quinazolinone and degradation of organic pollutants using CuWO₄ nanoparticles; A Green Approach
Source: Research Square preprint supplement (doi:10.21203/rs.3.rs-7982994/v1), 2025-11-26
Supplement: Supplementary file 1 [file b9faac0a4e865224f3738102.docx]

**Blue LED mediated synthesis of quinazolinone and degradation of organic pollutants using CuWO₄ nanoparticles; A Green Approach**

Murugan Arunachalapandi*, Rajakumar Utchimahali

Department of Chemistry and Research center, Sri Paramakalyani College, Alwarkurichi, 627 412, Tamil Nadu, India.

*corresponding author email ID: [arunachalapandi13@gmail.com](mailto:arunachalapandi13@gmail.com) ; co-author email ID: [rutchimahali29073@gmail.com](mailto:rutchimahali29073@gmail.com)

Graphical Abstract


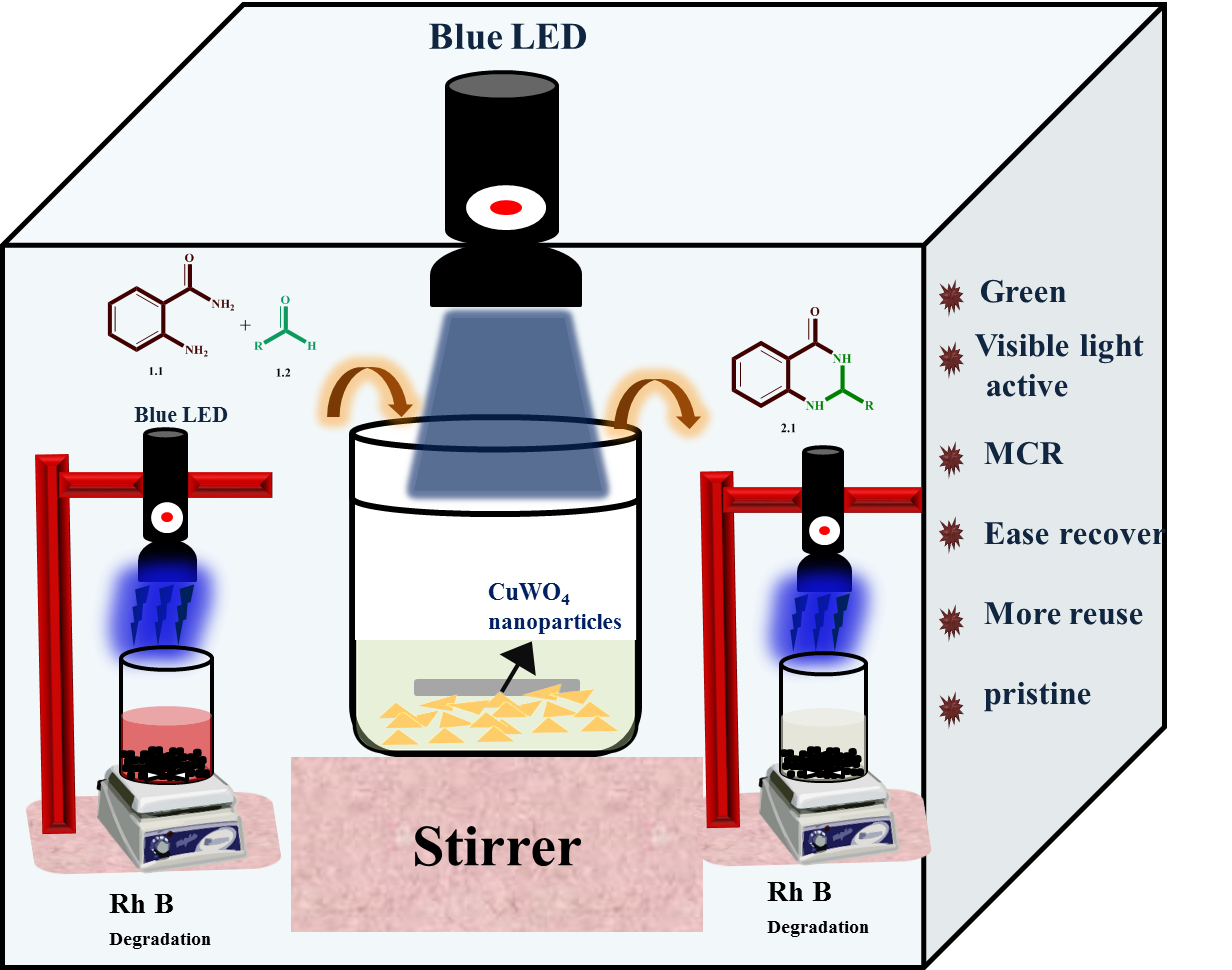


Abstract

Nanotechnology is a versatile tool to apply all chemistry research performed in this decade. Here in the present work, we successfully synthesize CuWO₄ nanoparticles using a simple co-precipitation method. The synthesized CuWO₄ nanoparticles were analyzed to know their properties by using various characterization tools such as XRD, UV-DRS, HR-SEM, and FT-IR analysis. From Tauc’s plot calculation we find the prepared nanoparticles having maximum activity in the visible light medium. The band edge distance between VB and CB ranged at 2.53 eV, confirming the capability of electrons in the valence band to absorb visible light to excite the conduction band. From this we successfully conduct the organic formation reaction in the synthesis of quinazolinone derivatives using CuWO₄ nanoparticles in a blue LED medium. In addition, CuWO₄ nanoparticles also performed for the degradation of rhodamine B dye from wastewater to get 95% of the dye removed in the presence of a visible light medium.

Keywords; CuWO4 nanoparticles, quinazolinone, Rhodamine B, Visible light

**SUPPLEMENTARY DATA**

**Derivatives of quinazolinones**

**2.1a. 2-phenyl-2,3-dihydroquinazolin-4(1H)-one**

Light brown solid; M.F-C14H12N2O; 1H NMR (400 MHz, DMSO-d6) (δ ppm); 5.755 (s, 1H), 6.658- 7.758 (m, 2H), 7.117 (s, 1H), 7.227-7.264 (t, 1H), 7.350-7.621 (m, 6H), 8.294 (s, 1H); 13C-NMR (100 MHz, DMSO-d6) (δ ppm); 67, 114, 115, 117, 126, 127, 128, 128, 133, 142, 146, 167.

**2.1b. 2-(4-bromophenyl)-2,3-dihydroquinazolin-4(1H)-one**

Pale yellow solid; M.F-C14H11BrN2O; 1H NMR (400 MHz, DMSO-d6) (δ ppm); 5.777 (s, 1H), 6.670- 7.769 (m, 2H), 7.219 (s, 1H), 7.242-7.280 (t, 1H), 7.341-7.672 (m, 5H), 8.399 (s, 1H); 13C-NMR (100 MHz, DMSO-d6) (δ ppm); 65, 114, 115, 117, 122, 126, 127, 130, 131, 131, 133, 145, 147, 163.

**2.1c. 2-(4-cyanophenyl)-2,3-dihydroquinazolin-4(1H)-one**

Pale yellow solid; M.F-C15H11N3O; 1H NMR (400 MHz, DMSO-d6) (δ ppm); 7.119 (s, 1H), 7.291- 7.312 (d, 2H), 7.642-7.649 (m, 2H), 7.661 (s, 1H), 7.794-8.210 (m, 4H), 8.761 (s, 1H); 13C-NMR (100 MHz, DMSO-d6) (δ ppm); 65, 113, 116, 119, 123, 128, 129, 130, 131, 132, 133, 136, 140, 150, 160, 195.

**2.1d. 2-(4-nitrophenyl)-2,3-dihydroquinazolin-4(1H)-one**

White solid; M.F-C14H11N3O3; 1H NMR (400 MHz, DMSO-d6) (δ ppm); 5.913 (s, 1H), 6.674- 6.778 (m, 2H), 7.248-7.337 (m, 2H), 7.598-7.751 (m, 2H), 7.341-7.672 (m, 2H), 8.251-7.257 (s, 1H), 8.528 (s, 1H); 13C-NMR (100 MHz, DMSO-d6) (δ ppm); 65, 115, 115, 117, 124, 127, 128, 134, 147, 147, 149, 163.

**2.1e. 2-(4-carboxyphenyl)-2,3-dihydroquinazolin-4(1H)-one**

Dirty white solid; M.F-C15H12N2O3; 1H NMR (400 MHz, DMSO-d6) (δ ppm); 6.528-6,57 (d, 1H), 6.681- 6.782 (m, 1H), 7.230-7.748 (m, 5H), 8.002-9.430 (m, 3H), 13.321 (s, 1H); 13C-NMR (100 MHz, DMSO-d6) (δ ppm); 87, 116, 121, 124, 125, 126, 128, 129, 130, 130, 131, 132, 132, 163.

**2.1f. 2-(4-methylphenyl)-2,3-dihydroquinazolin-4(1H)-one**

Yellow solid; M.F-C15H14N2O; 1H NMR (400 MHz, DMSO-d6) (δ ppm); 2.331 (s, 3H), 5.776 (s, 1H), 6.671- 6.770 (m, 2H), 7.226-7.62 (m, 6H), 7.676 (s, 1H), 8.399 (s, 1H); 13C-NMR (100 MHz, DMSO-d6) (δ ppm); 26, 65, 114, 115, 117, 124, 127, 128, 134, 146, 147, 149, 163.


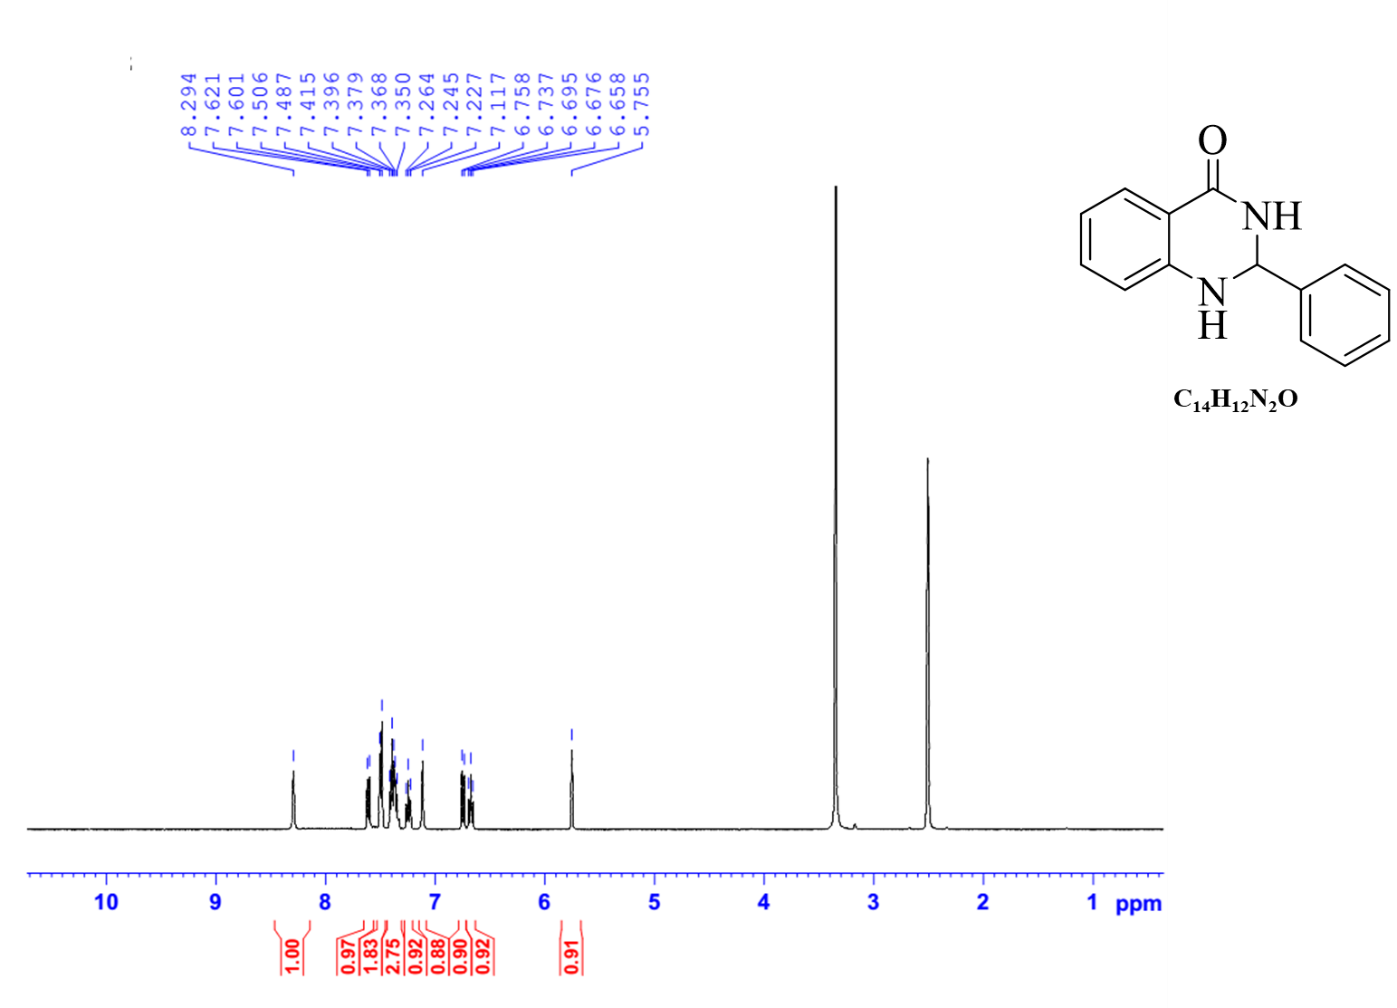


**Fig. S1**; 1H-NMR of **2.1a**


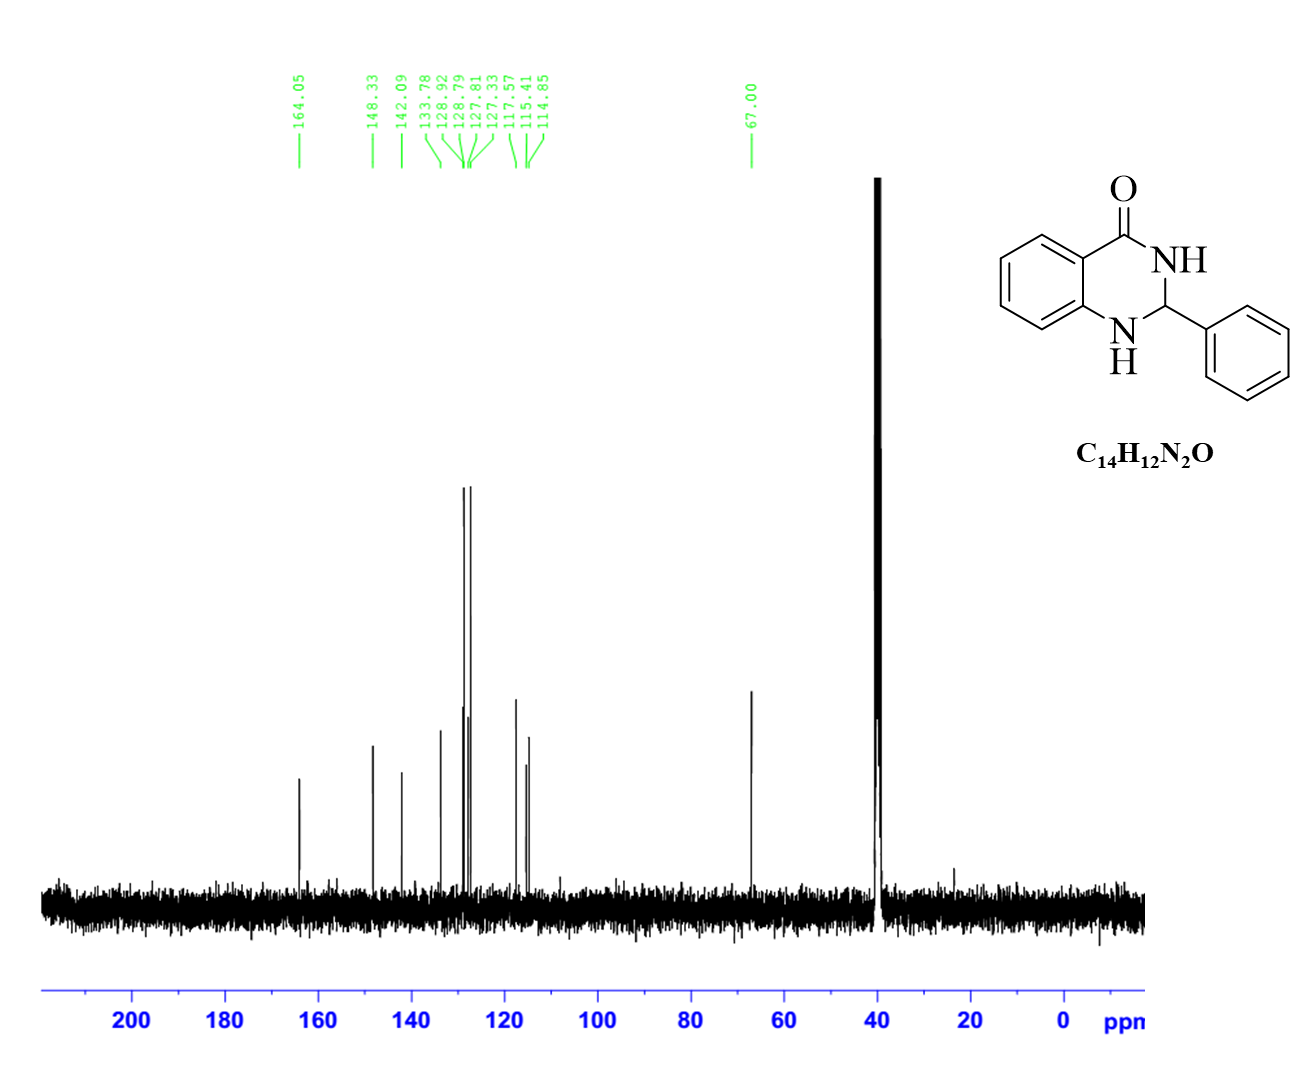


**Fig. S2**; 13C-NMR of **2.1a**


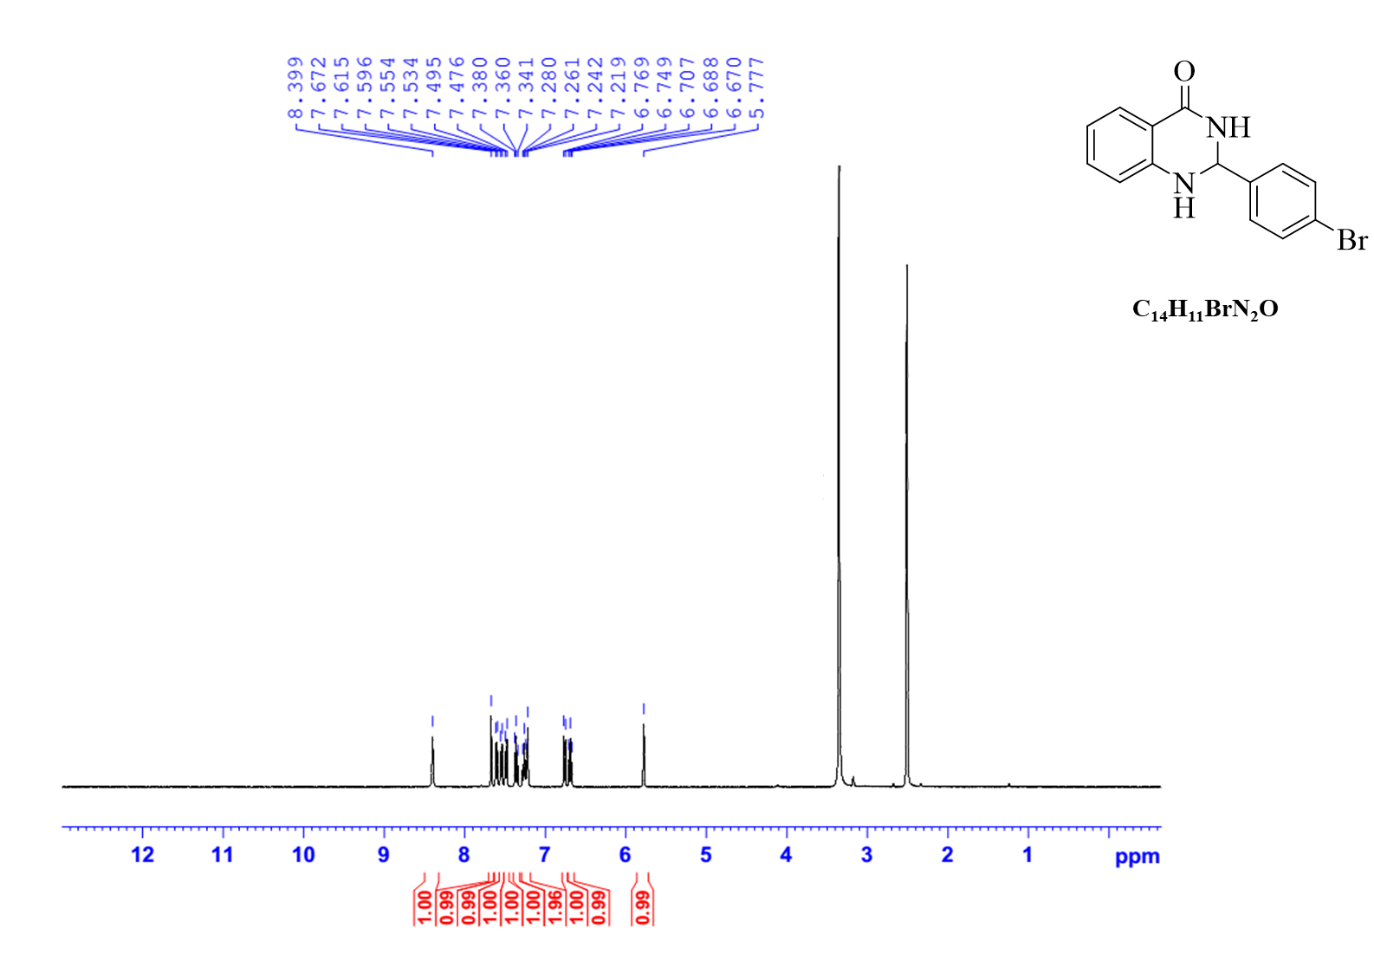


**Fig. S3**; 1H-NMR of **2.1b**


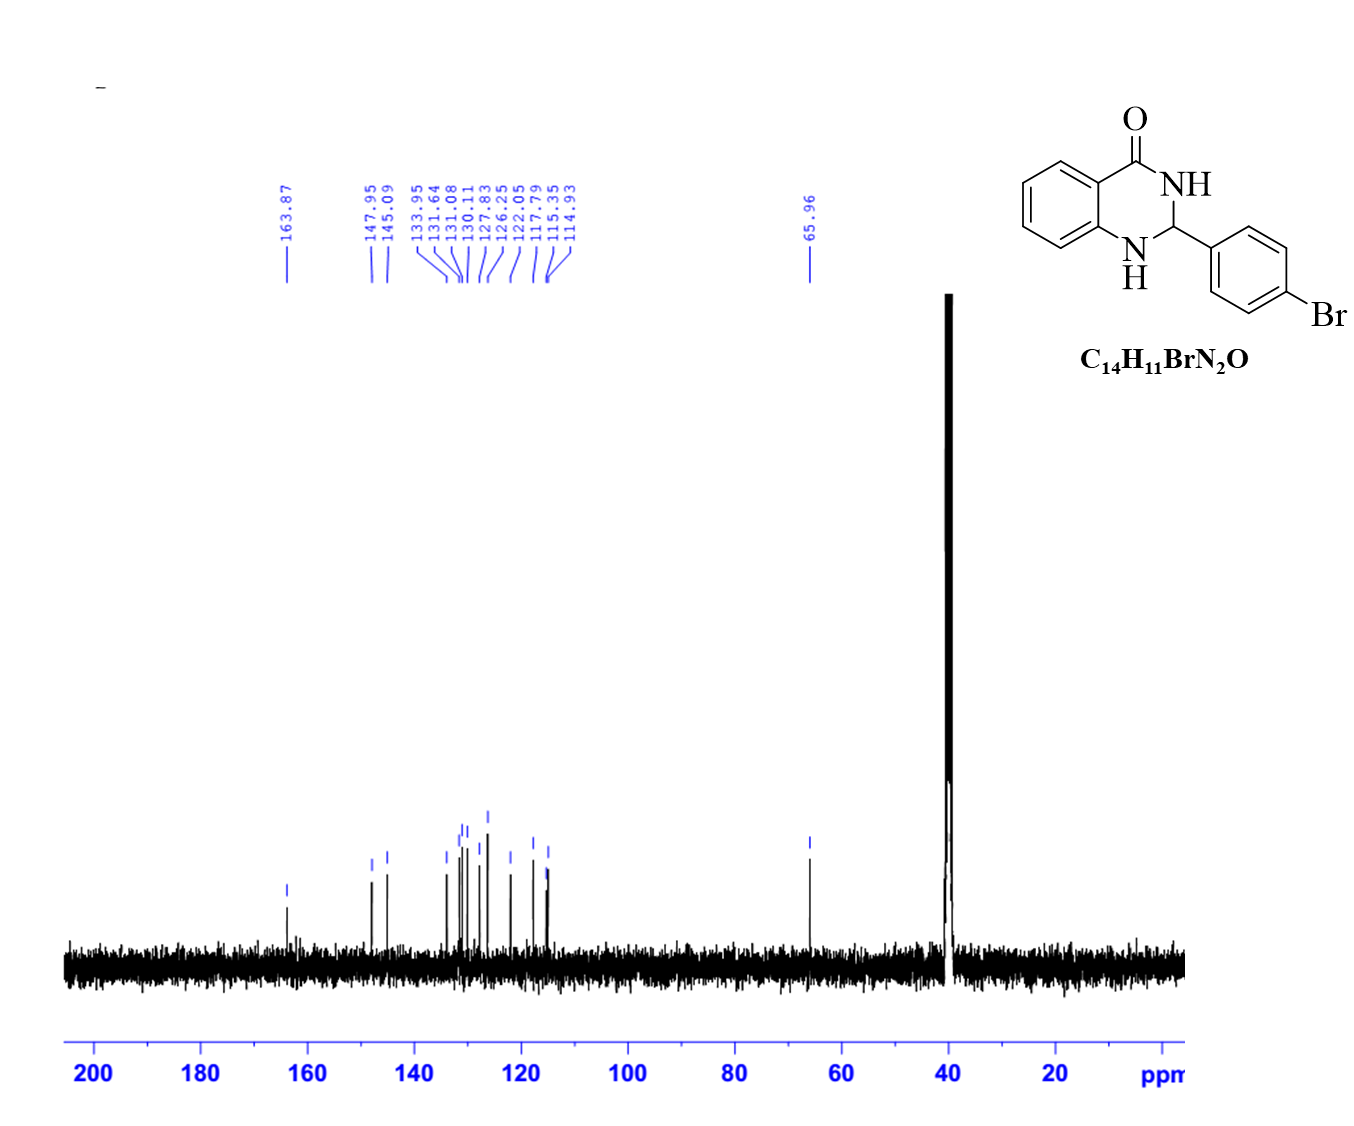


**Fig. S4**; 13C-NMR of **2.1b**


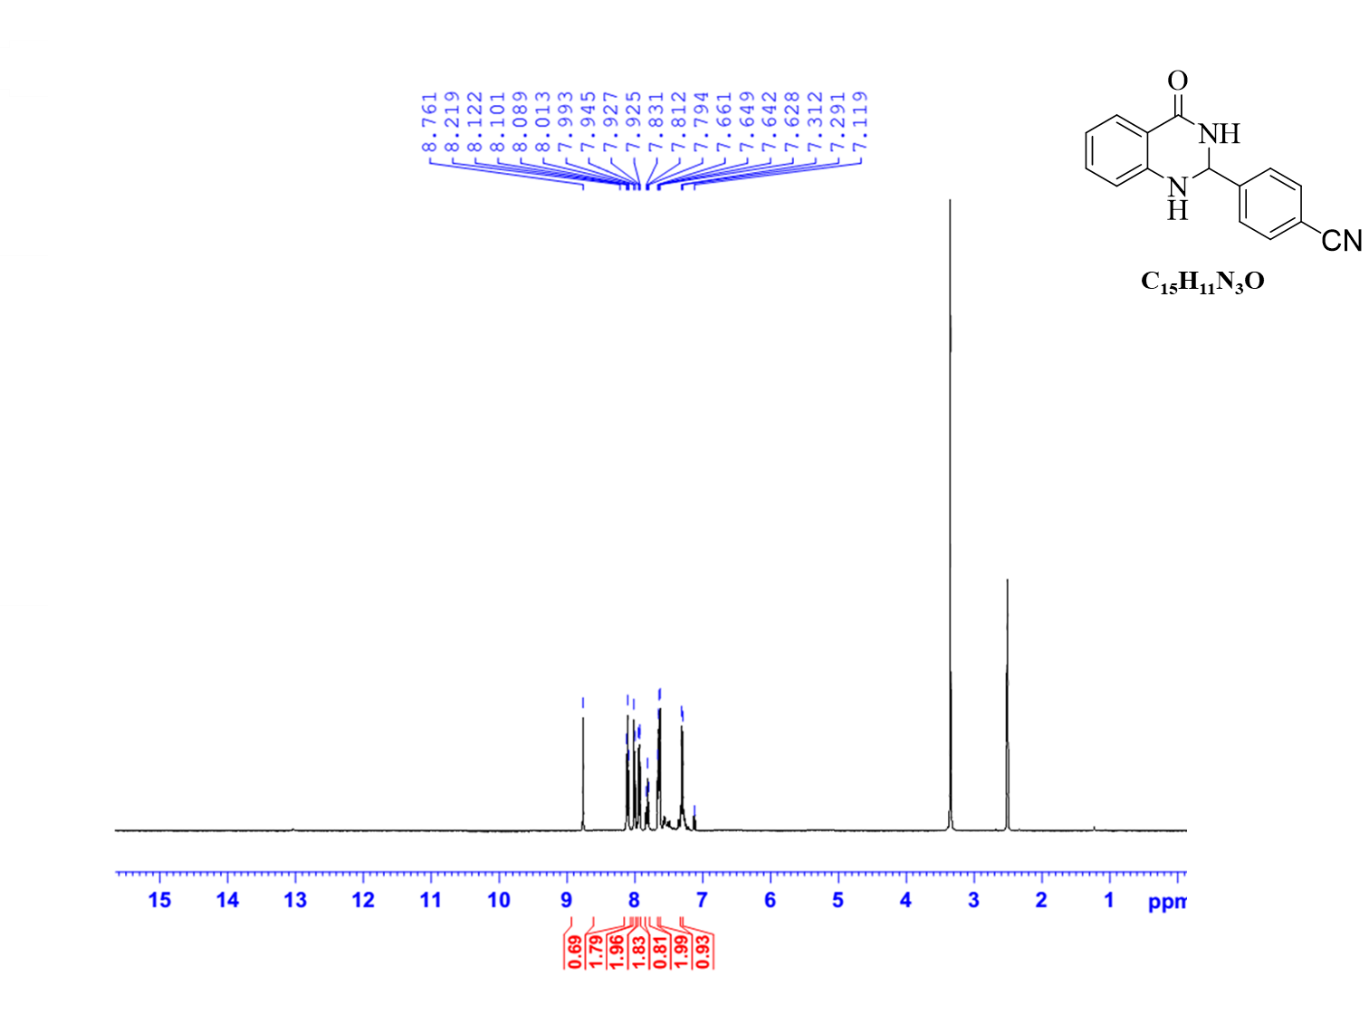


**Fig. S5**; 1H-NMR of **2.1c**


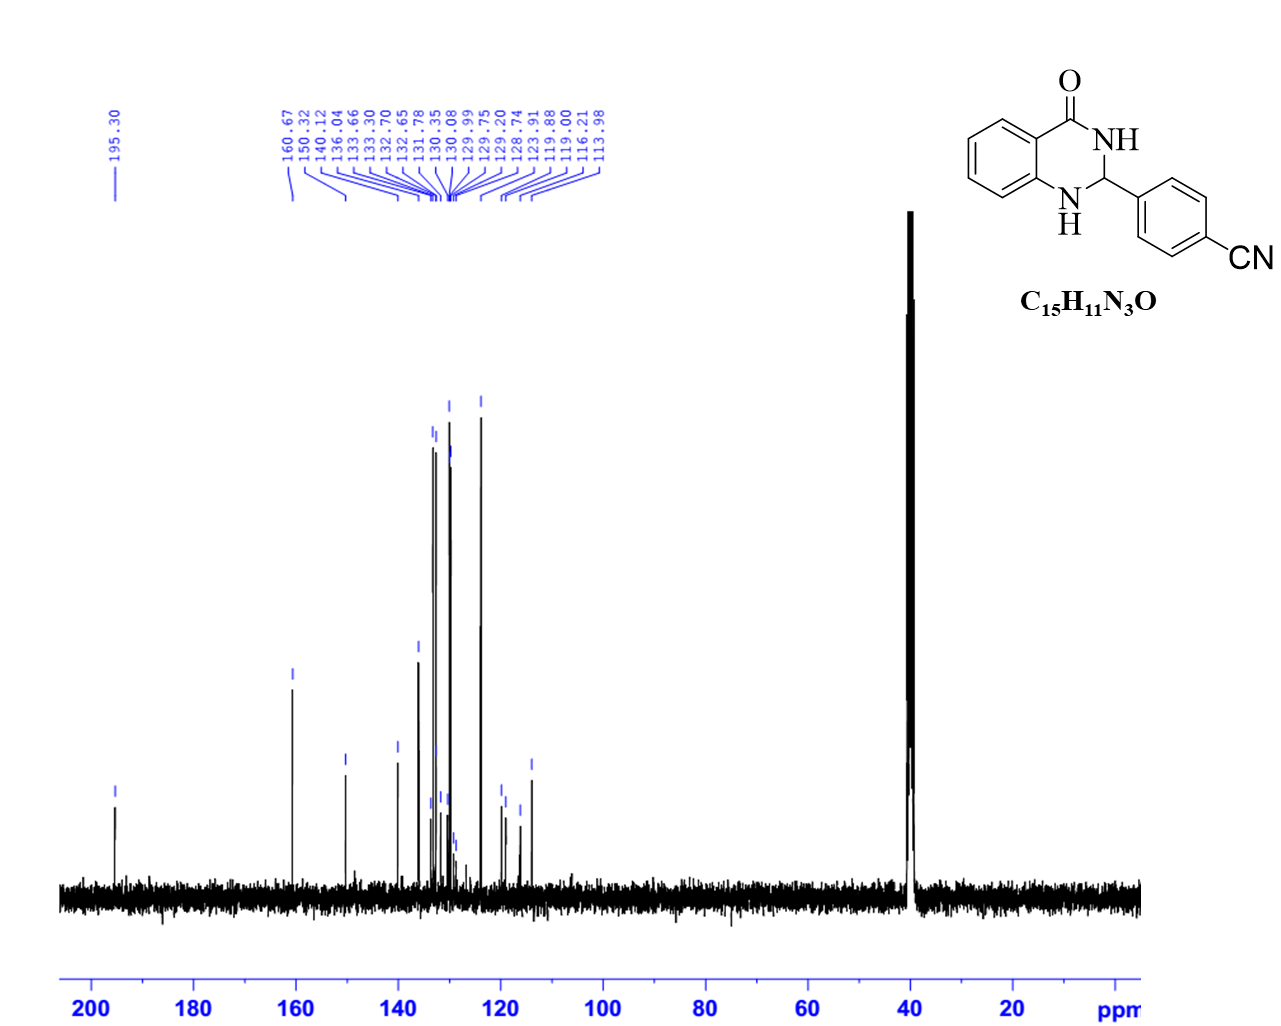


**Fig. S6**; 13C-NMR of **2.1c**


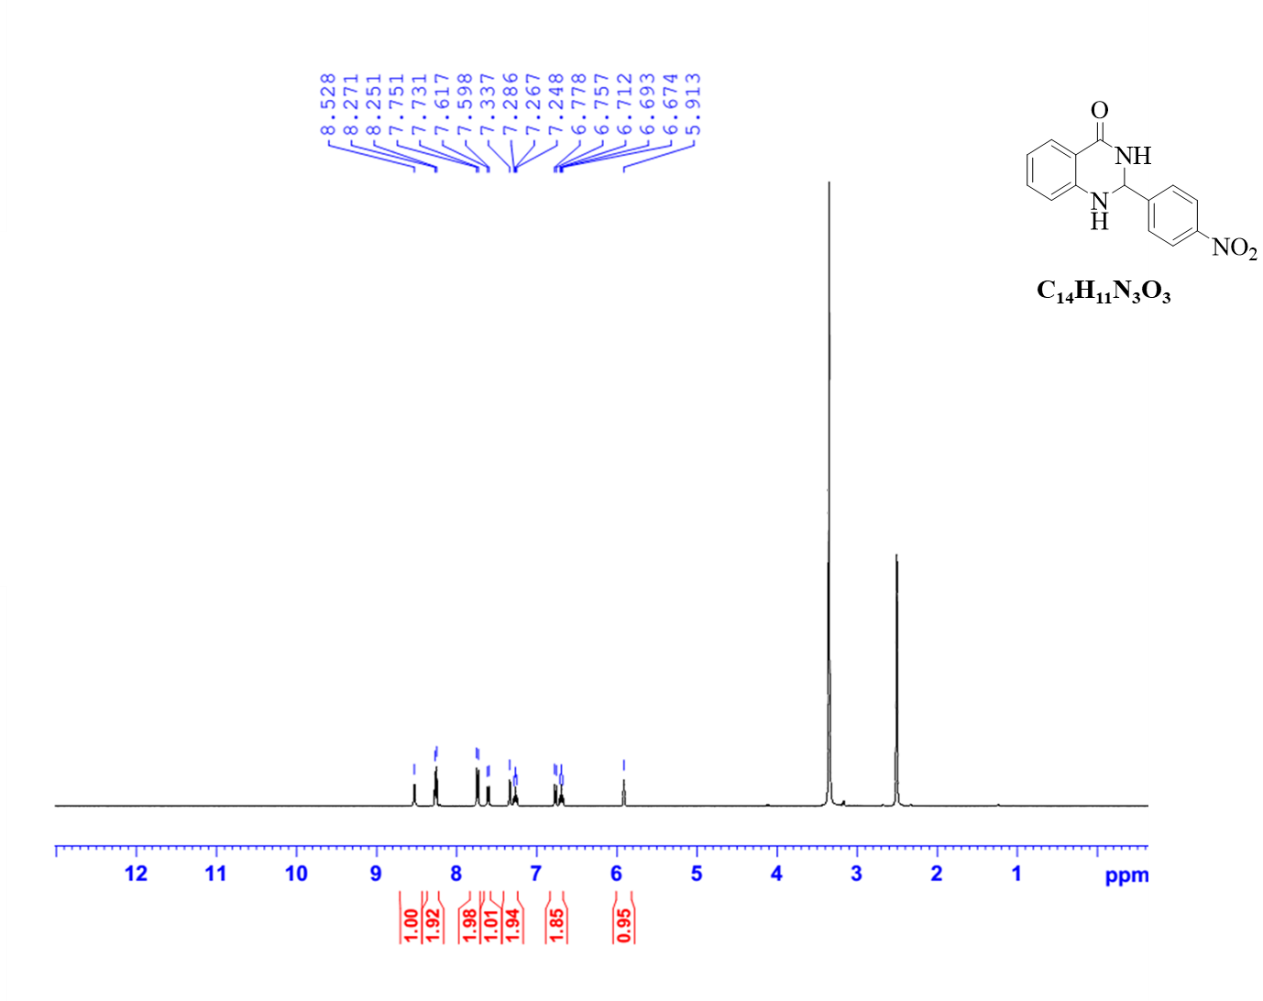


**Fig. S7**; 1H-NMR of **2.1d**


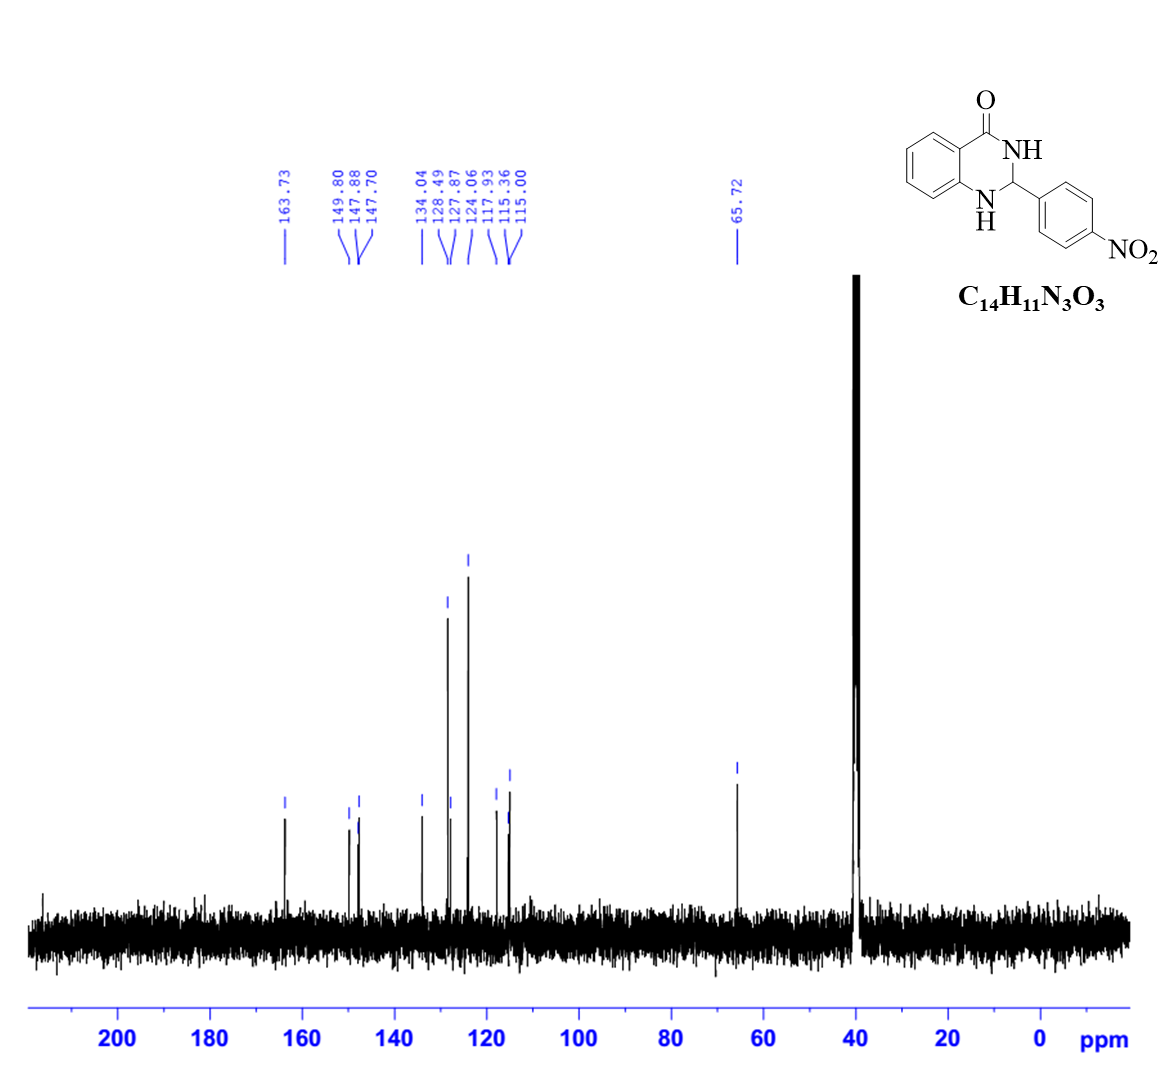


**Fig. S8**; 13C-NMR of **2.1d**


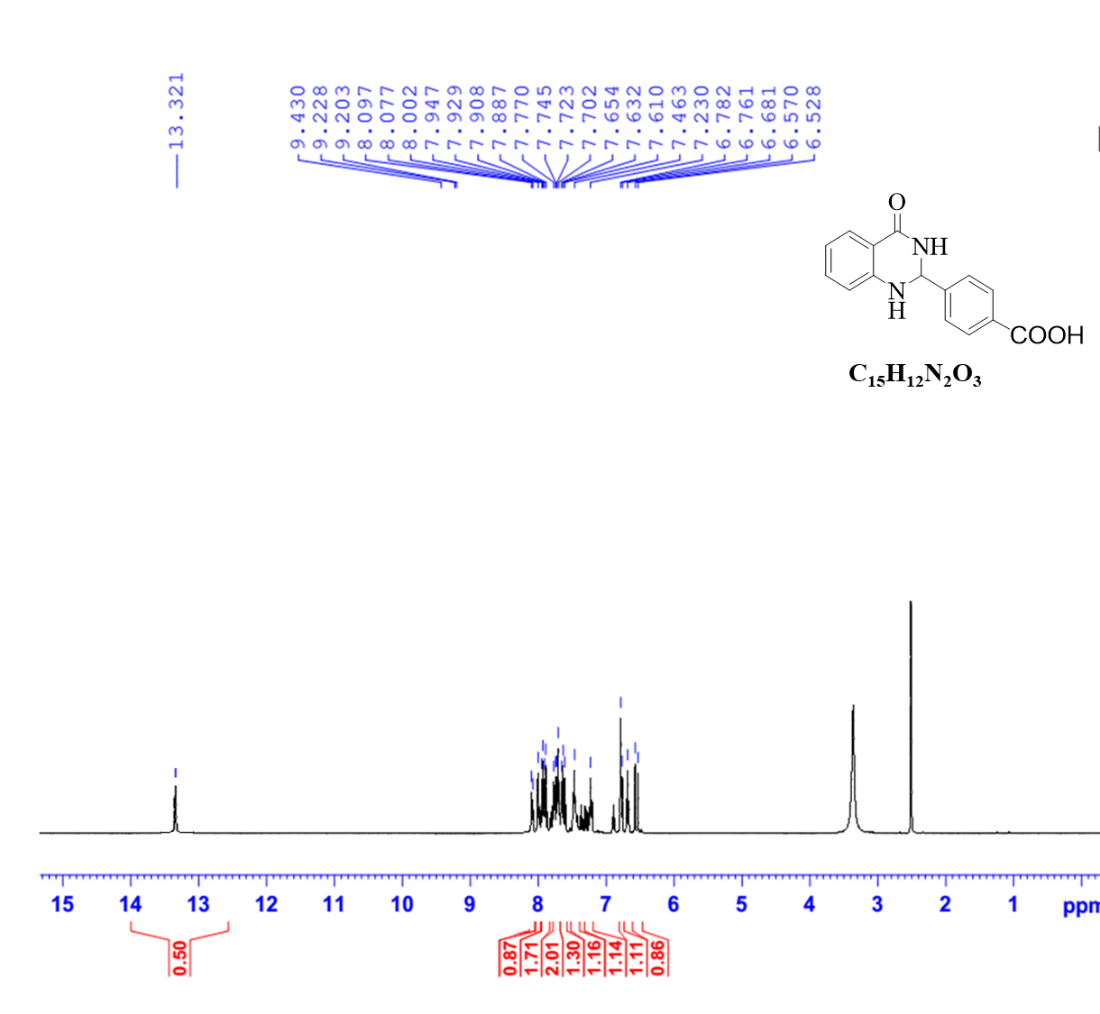


**Fig. S9**; 1H-NMR of **2.1e**


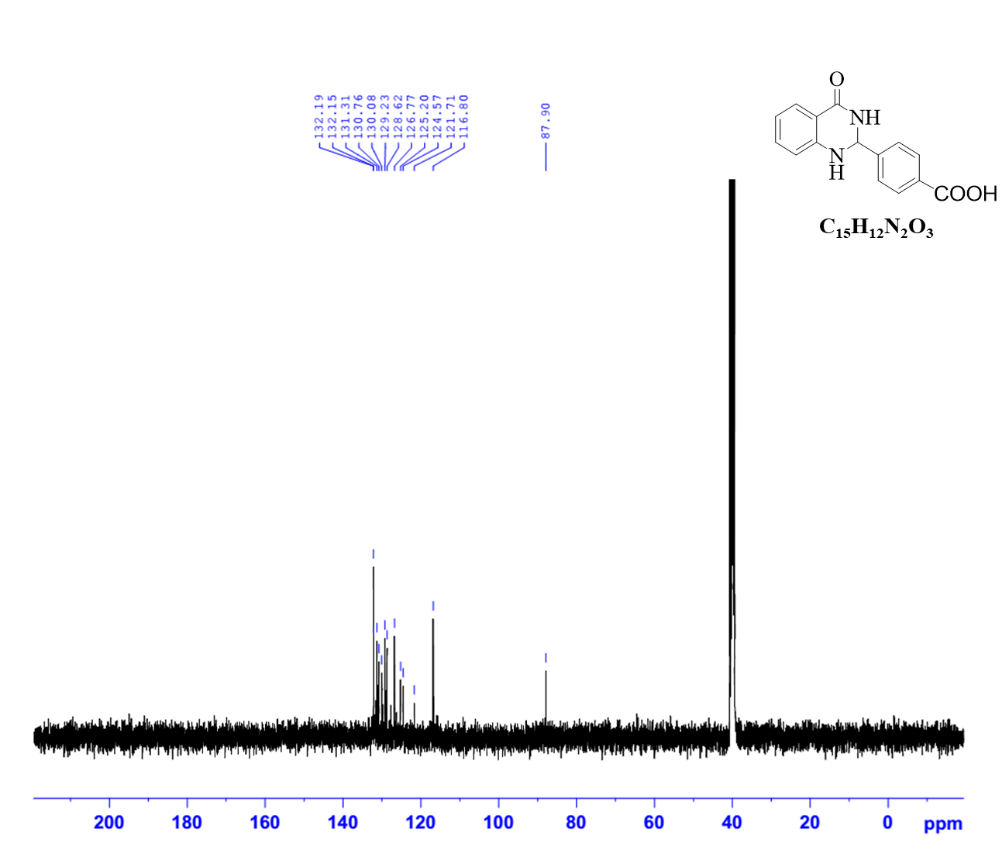


**Fig. S10**; 13C-NMR of **2.1e**


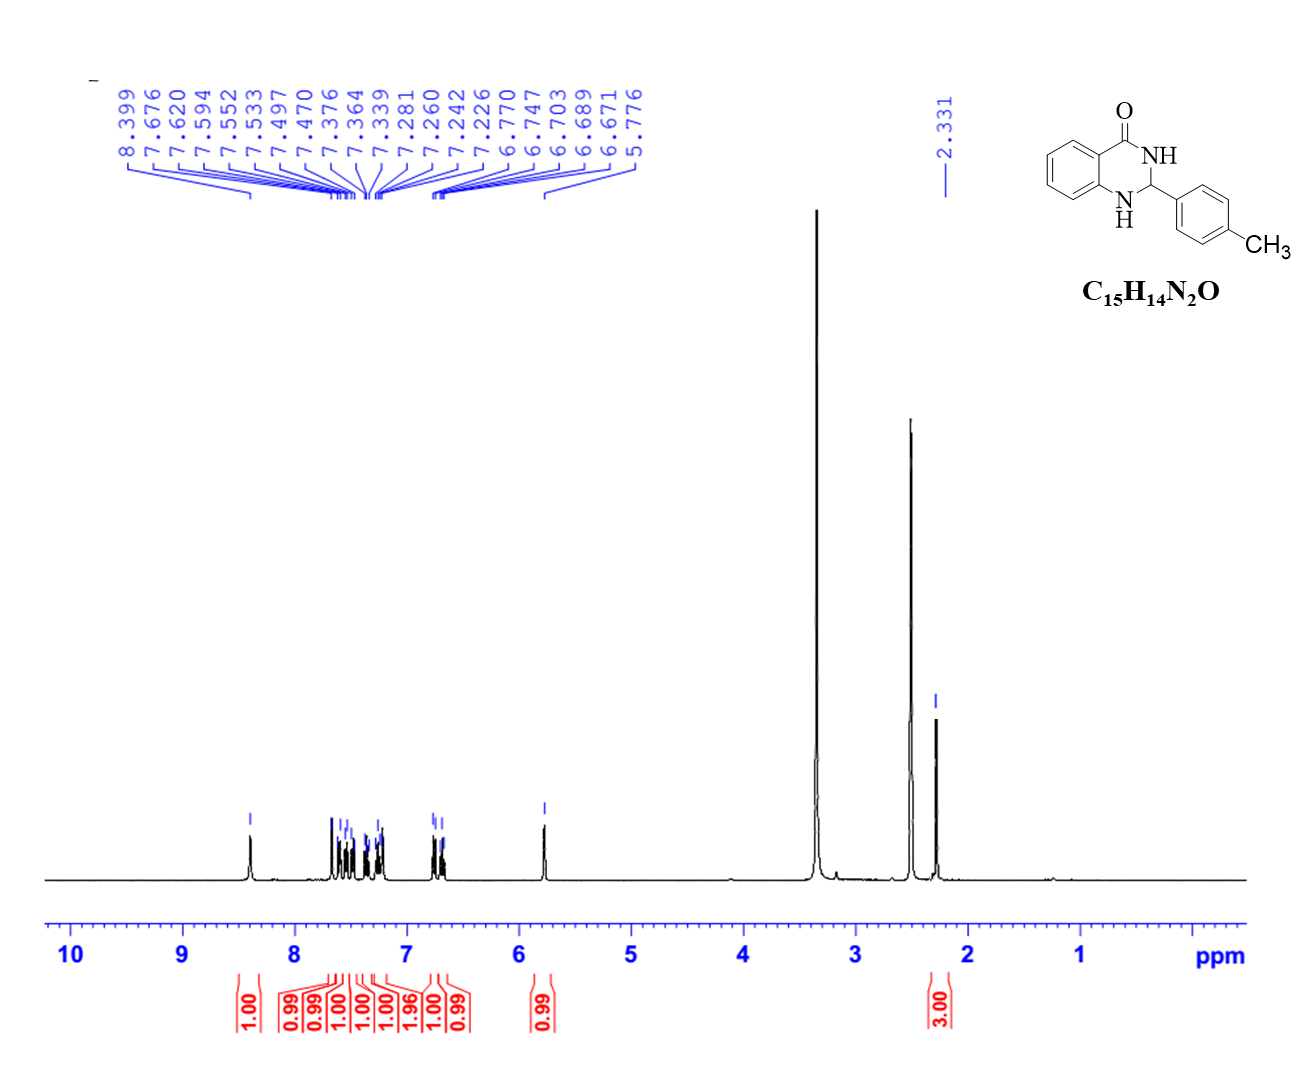


**Fig. S11**; 1H-NMR of **2.1f**


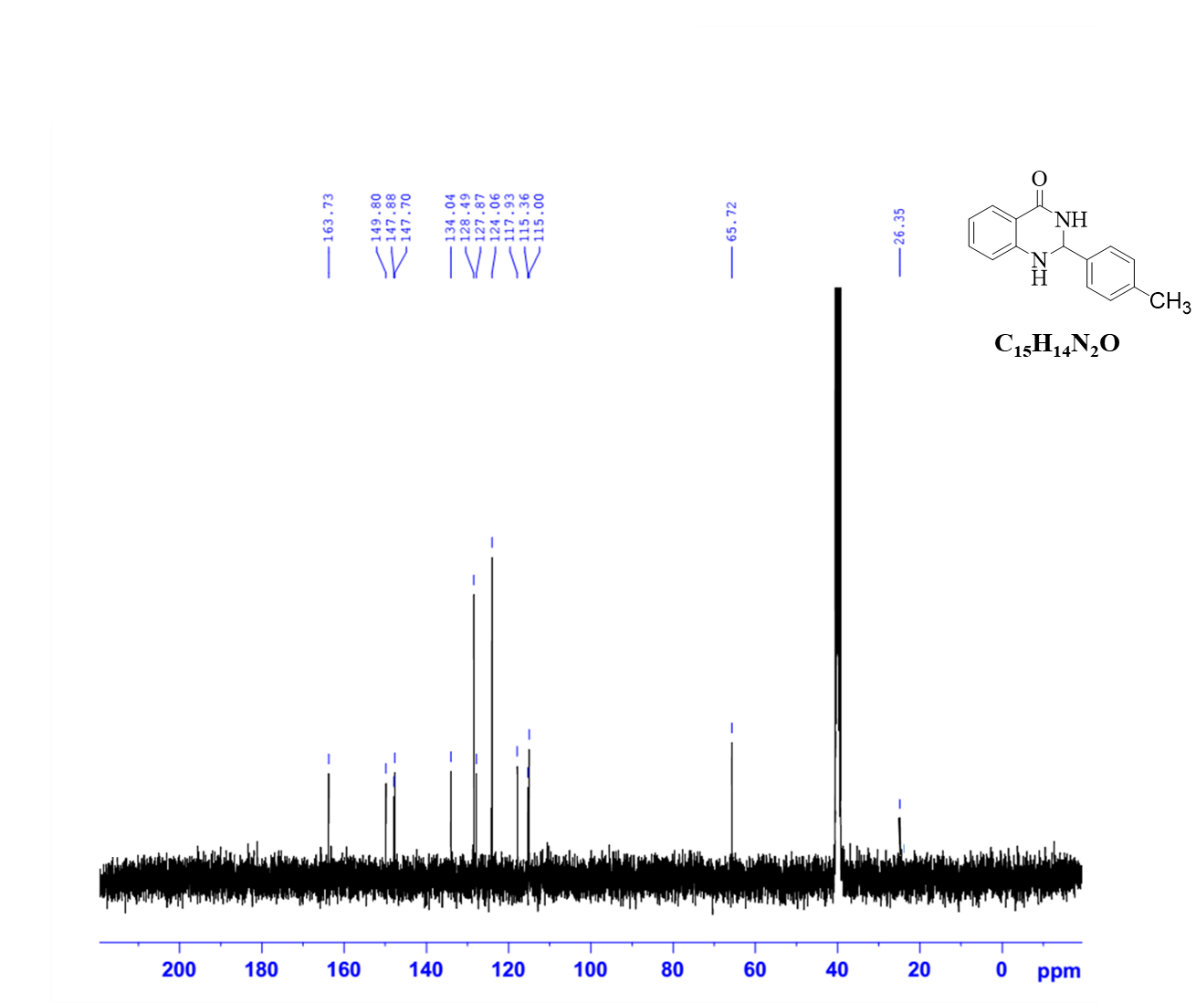


**Fig. S12**; 13C-NMR of **2.1f**
